# Supplementary material for: Airway remodelling rather than cellular infiltration characterizes both type2 cytokine biomarker‐high and ‐low severe asthma
Source: PubMed Central journal article supplement (PMC9790286; doi:10.1111/all.15376), 2022-05-25

# Supplementary figure E1

Representative immunostaining

T2-high FeNO non suppressor

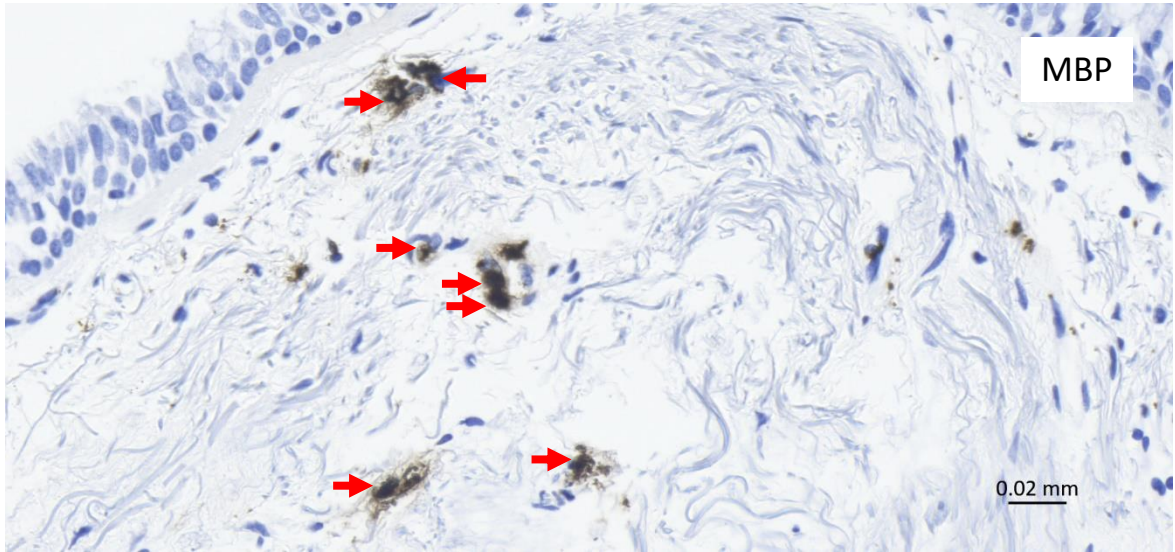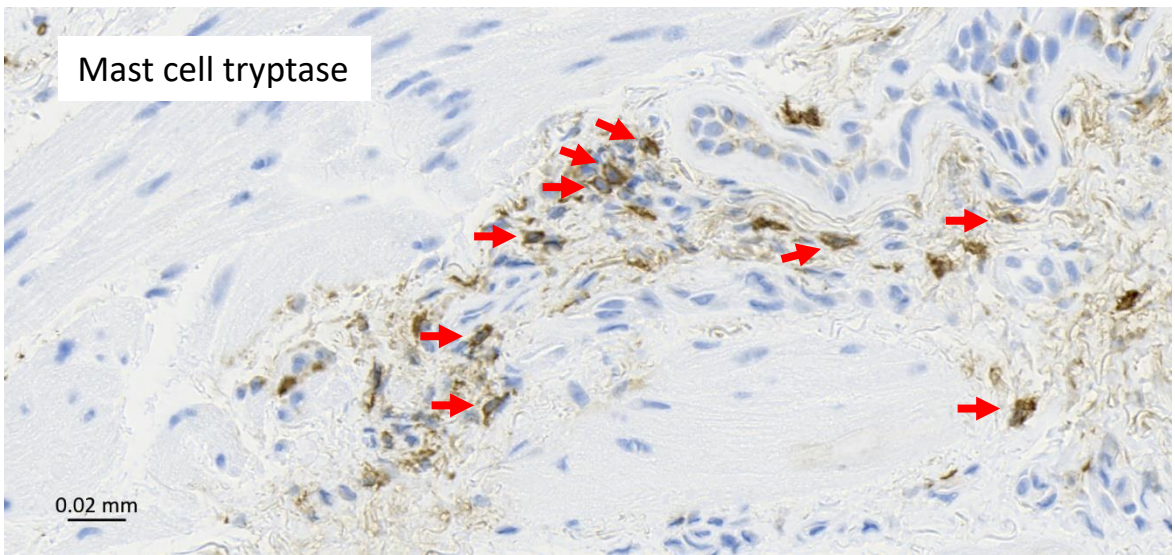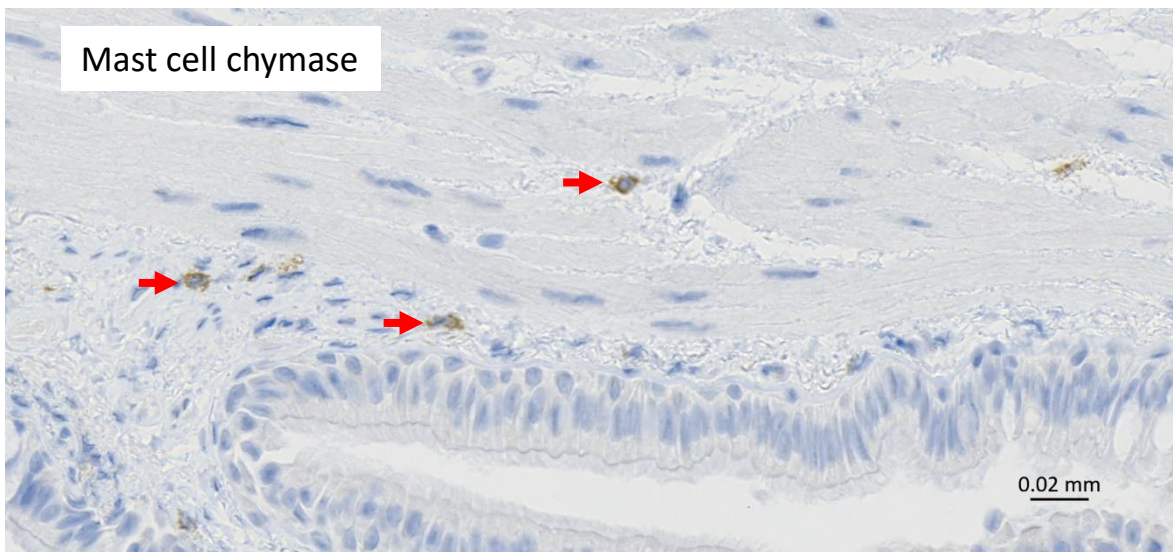

## T2-high FeNO non suppressor

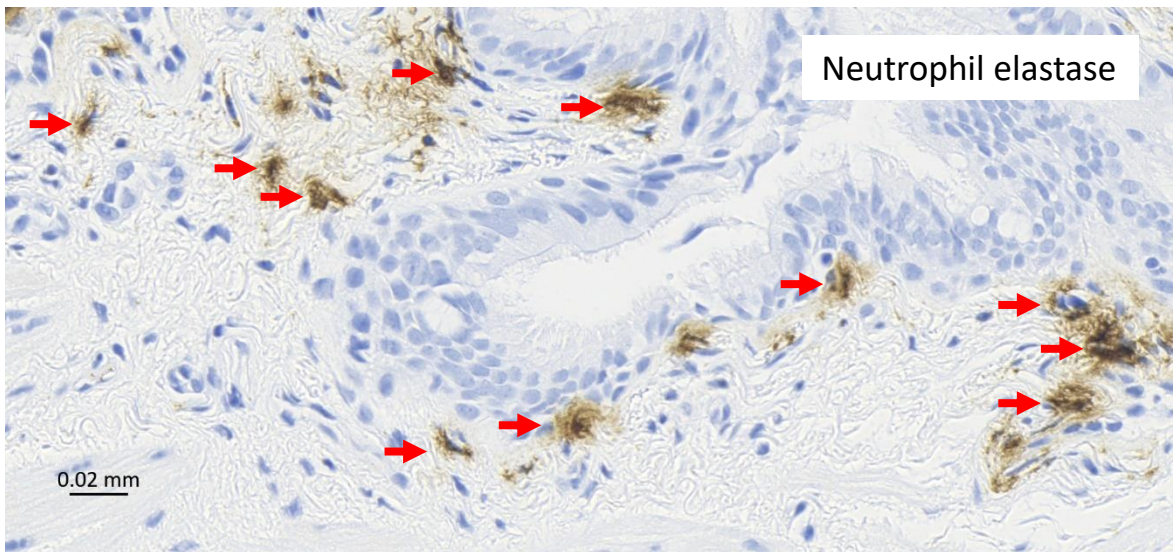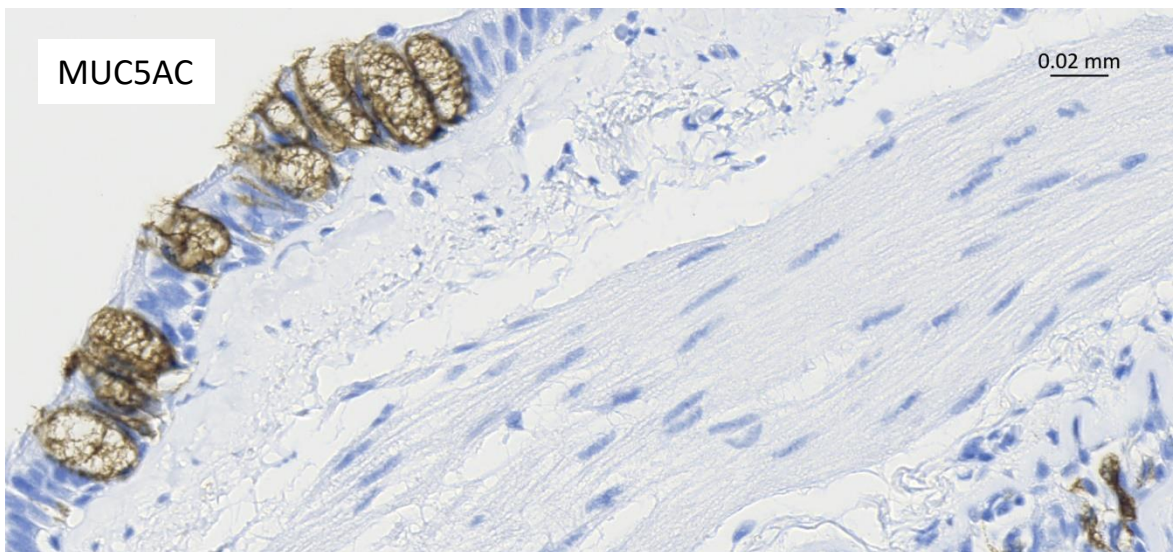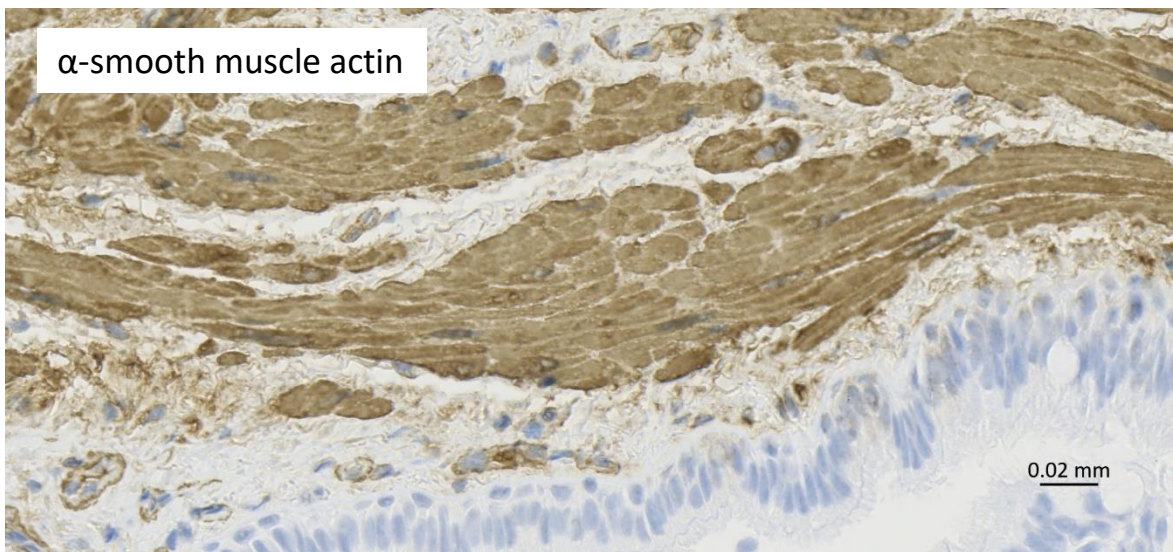

# T2-low

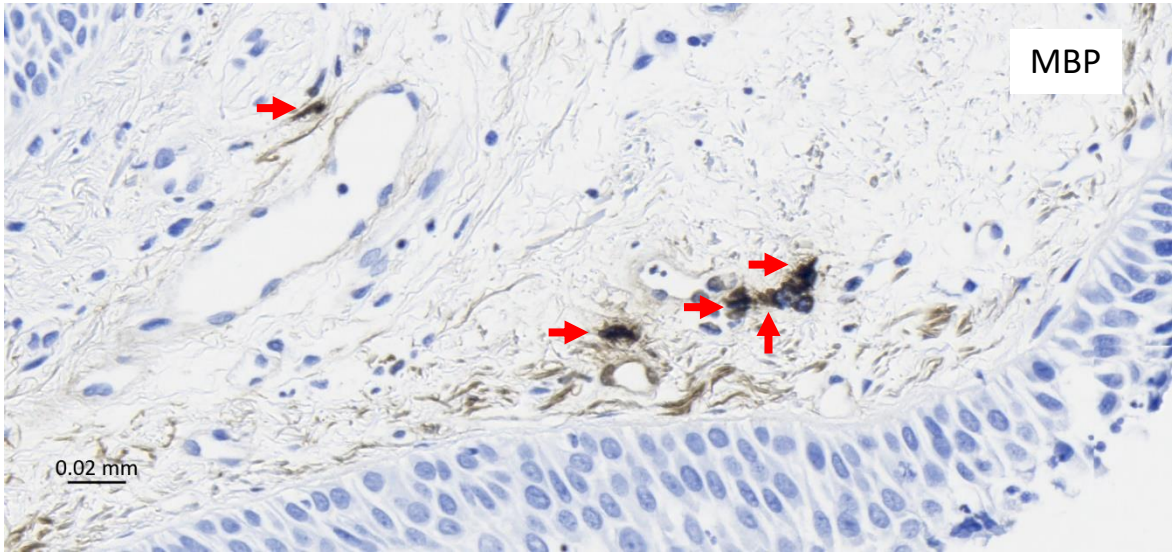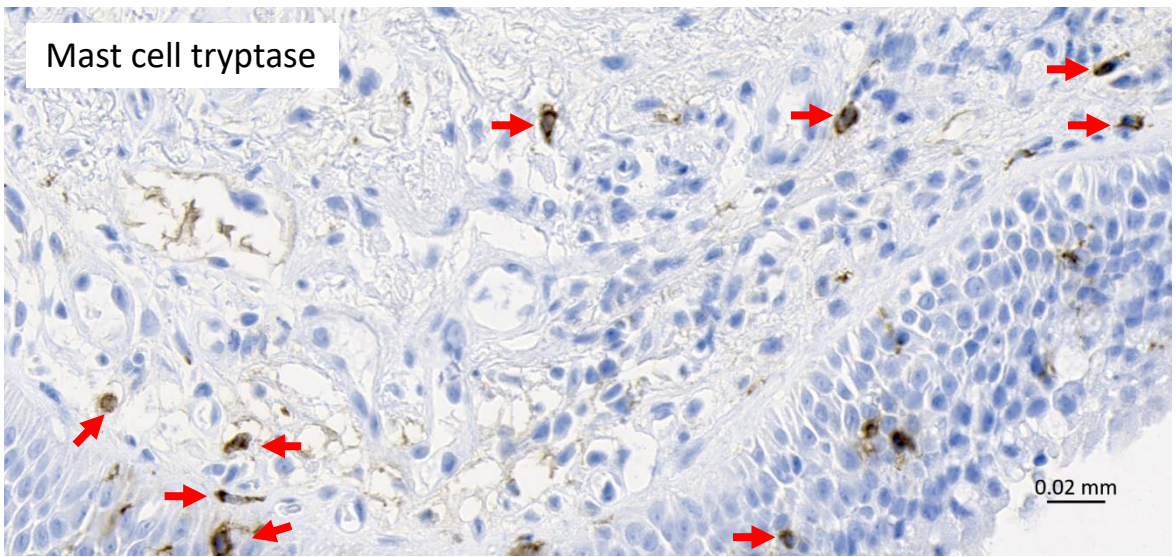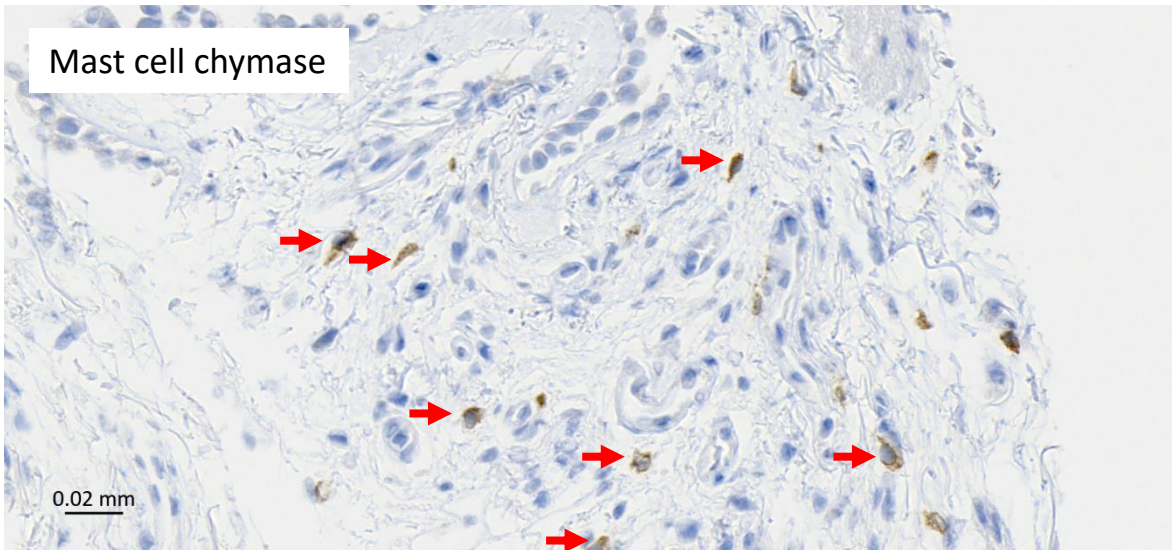

T2-low

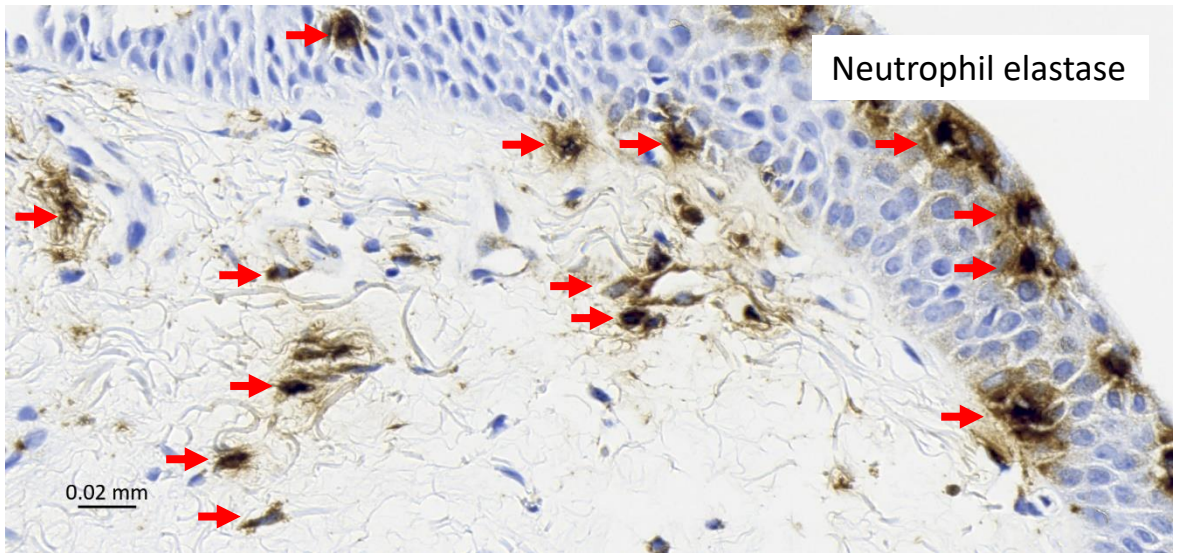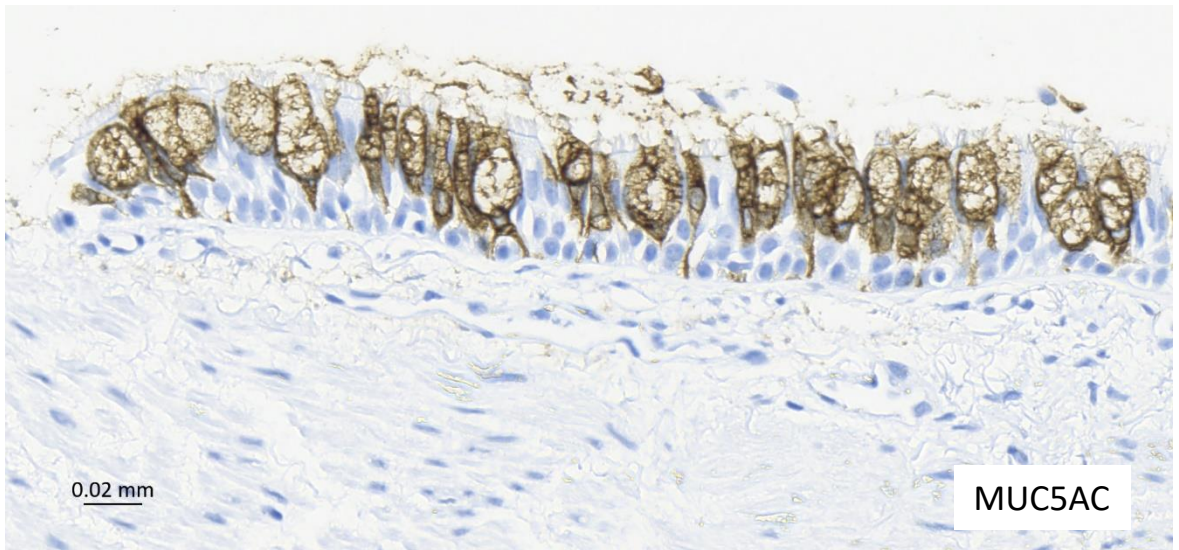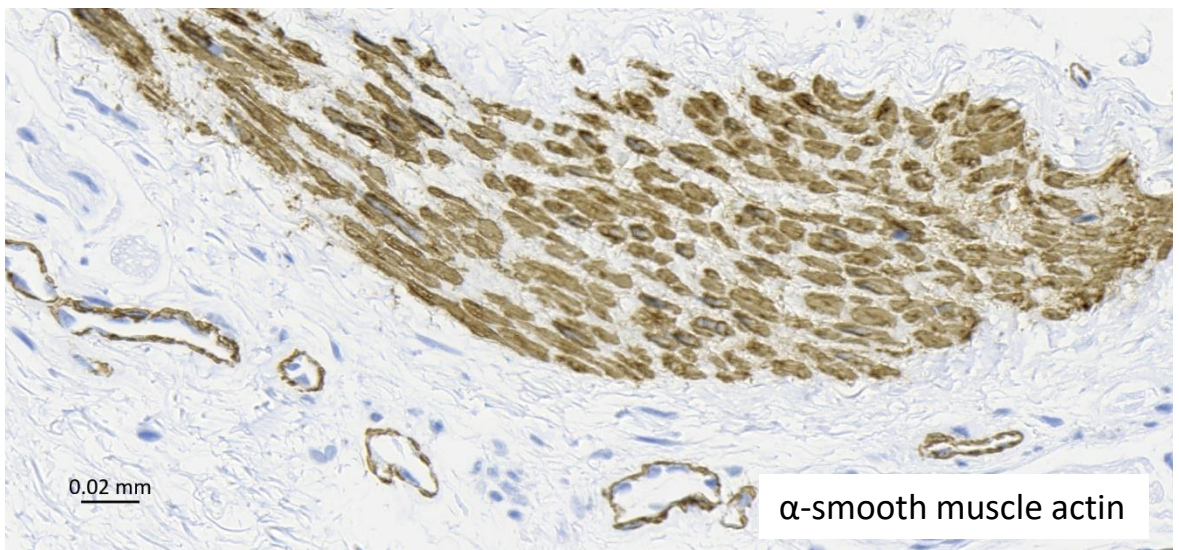

# Healthy control

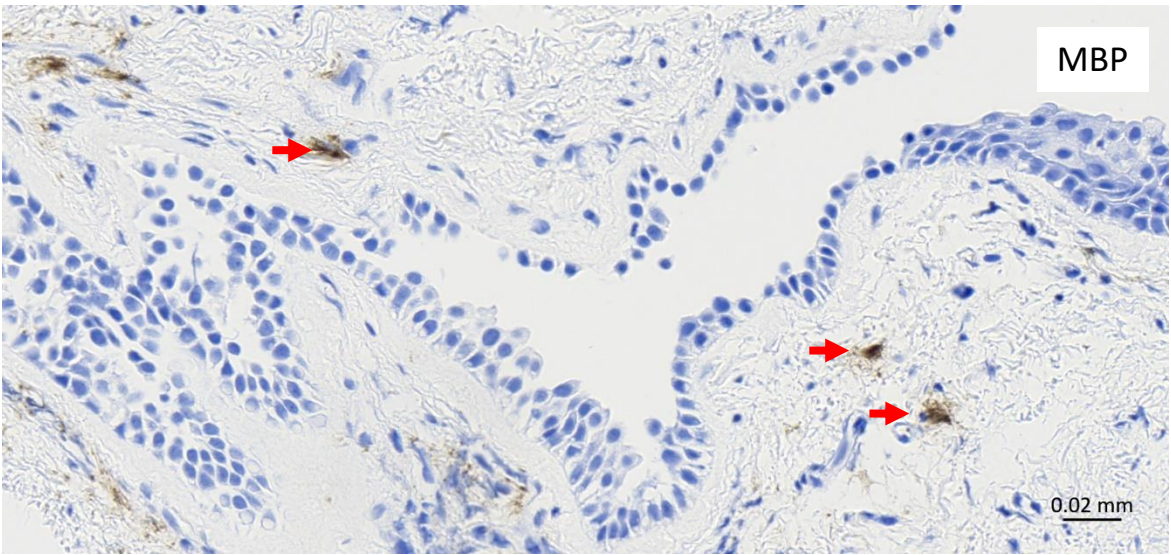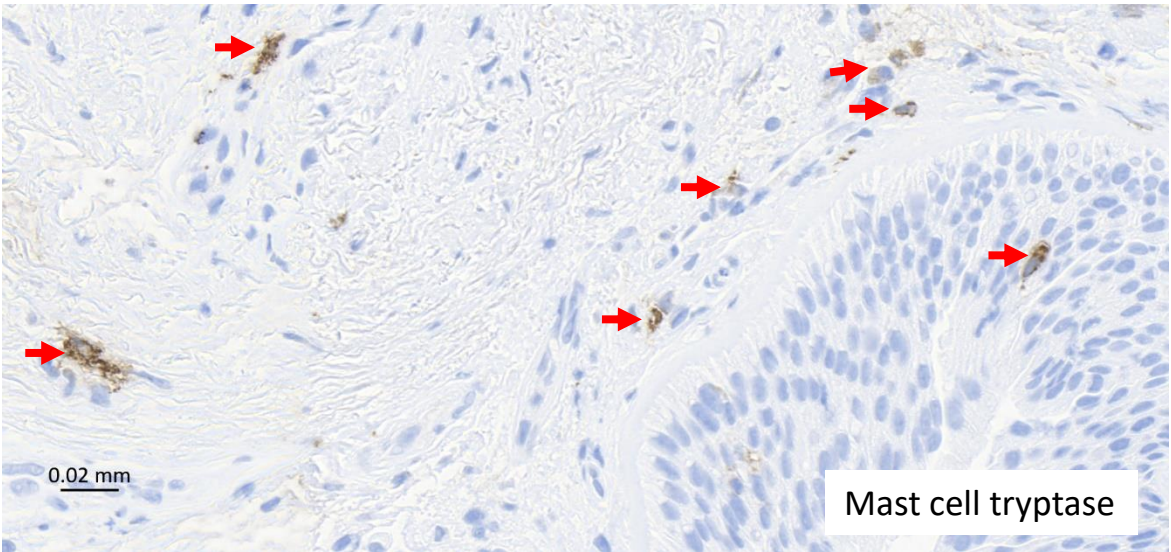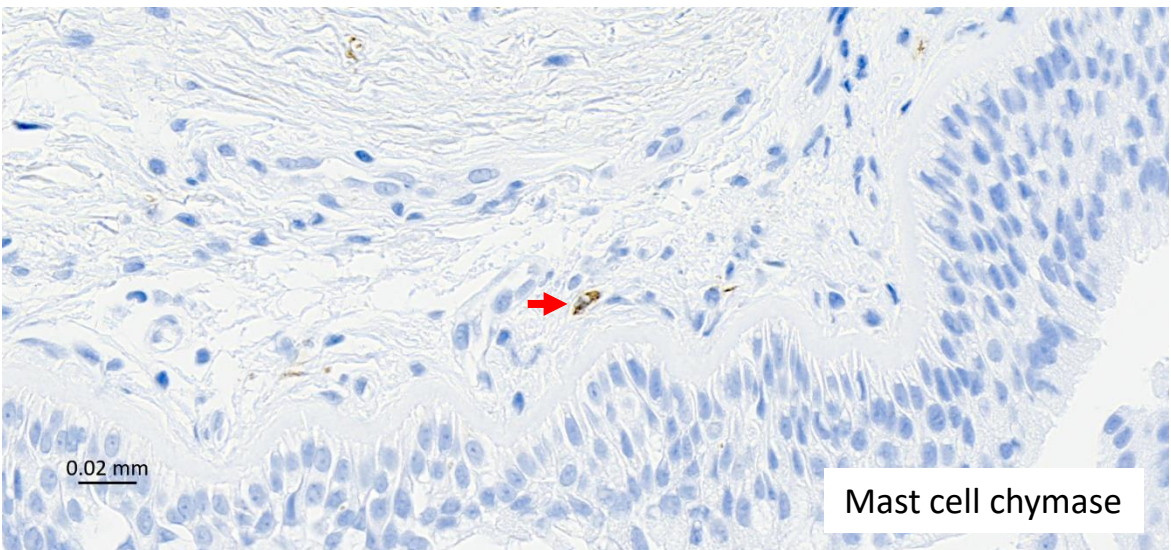

# Healthy control

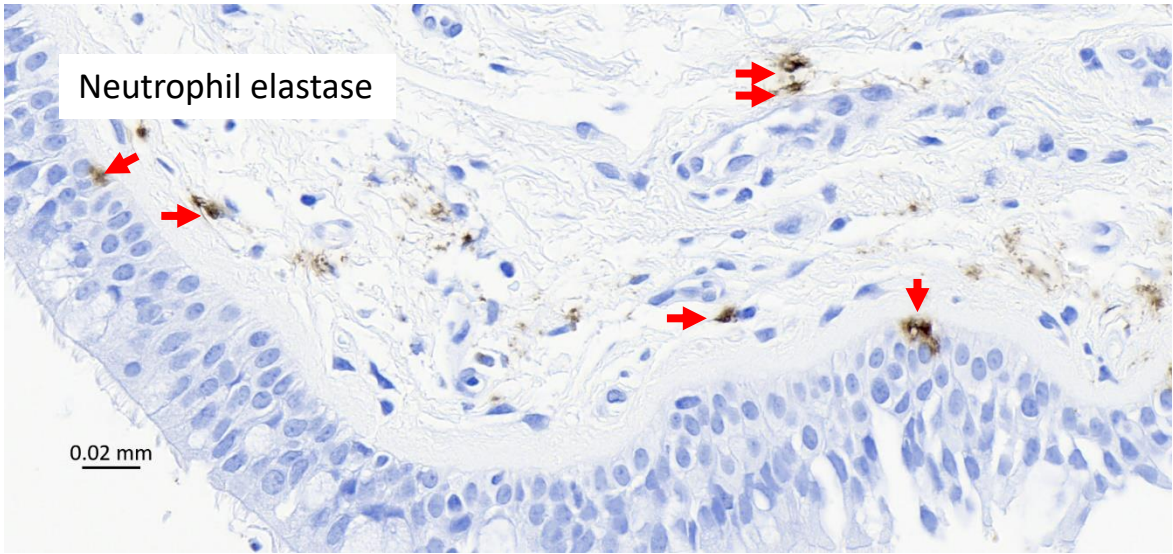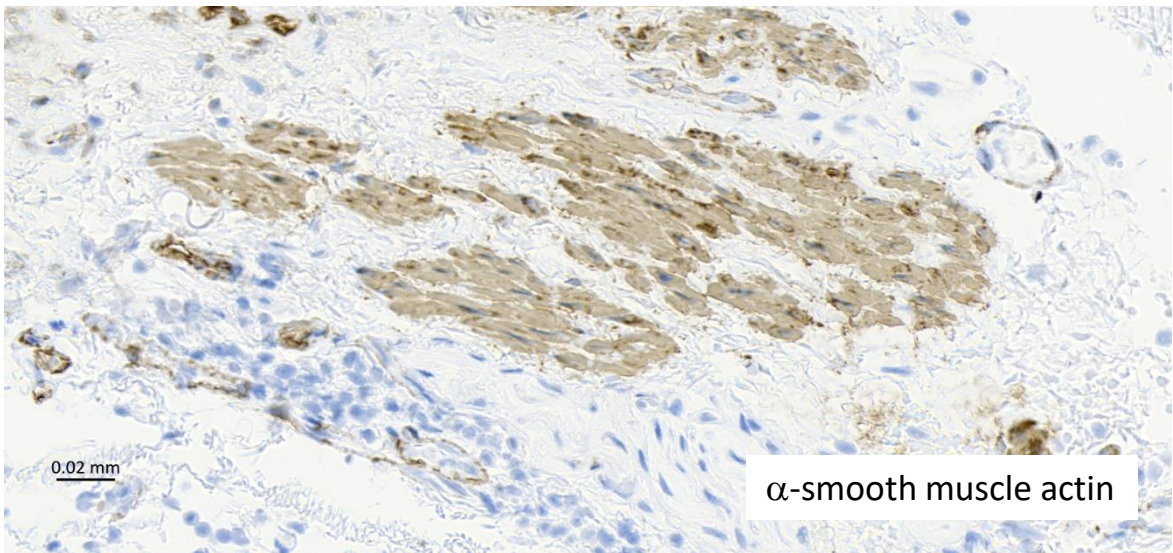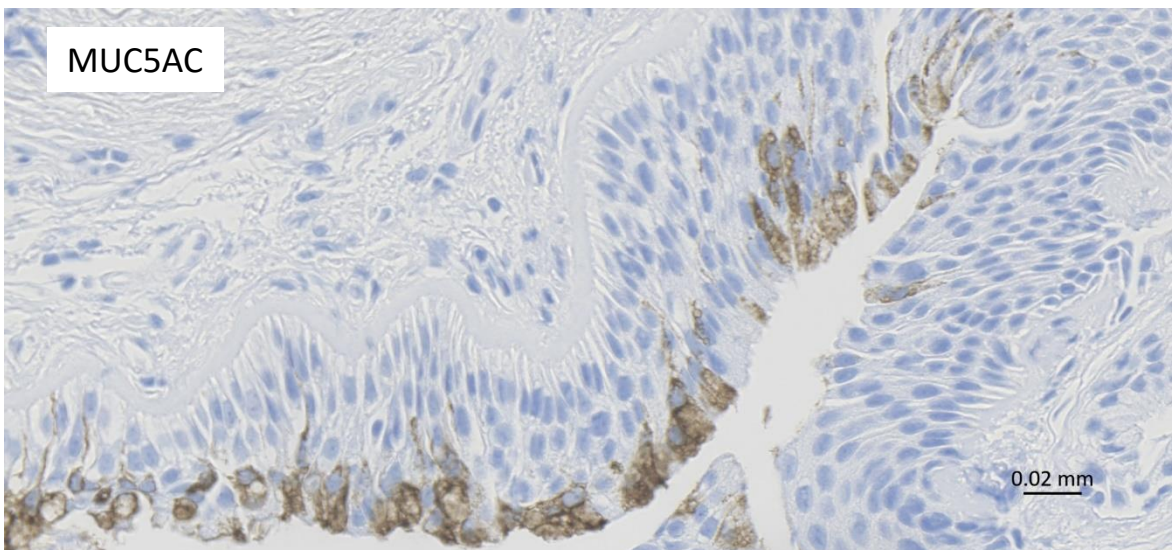

Isotype controls

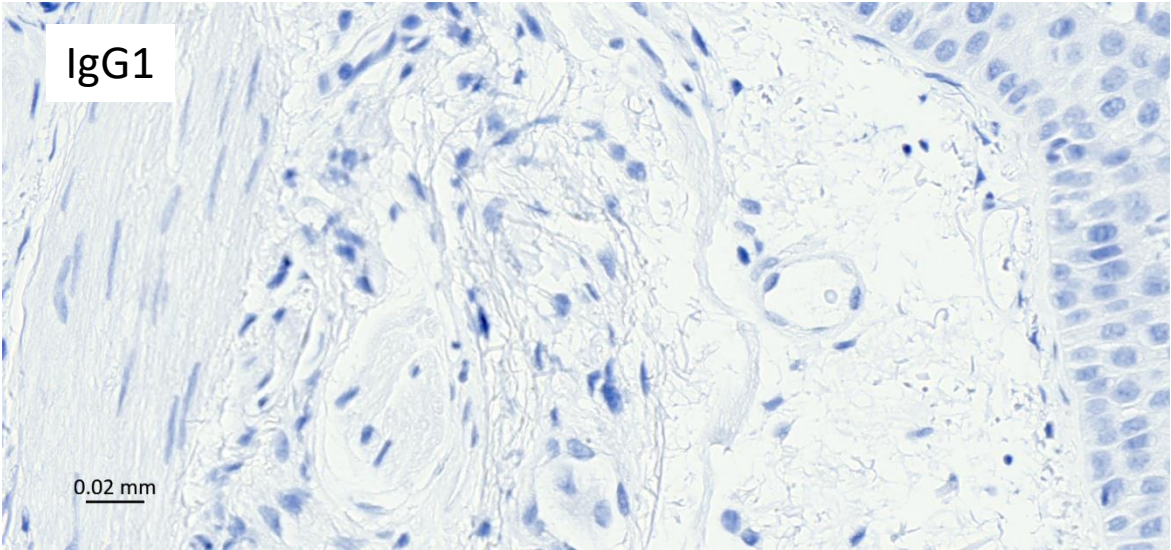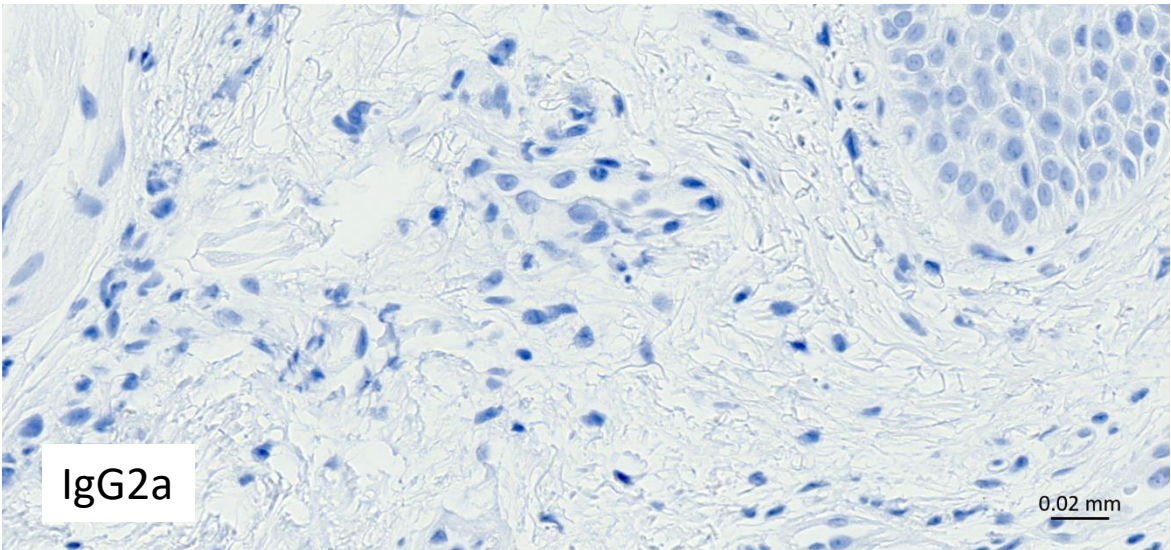

Supplement: ALL-77-2974-s011.pdf [file ALL-77-2974-s011.pdf]
