# Supplementary material for: Airway remodelling rather than cellular infiltration characterizes both type2 cytokine biomarker‐high and ‐low severe asthma
Source: PubMed Central journal article supplement (PMC9790286; doi:10.1111/all.15376), 2022-05-25
Supplement: ALL-77-2974-s003.pdf [file ALL-77-2974-s003.pdf]

# Supplementary figure E9

Post hoc analysis with T2-low patients defined by blood eosinophils  $\leq 0.15 \times 10^9/L$  and FeNO  $\leq 25$  ppb

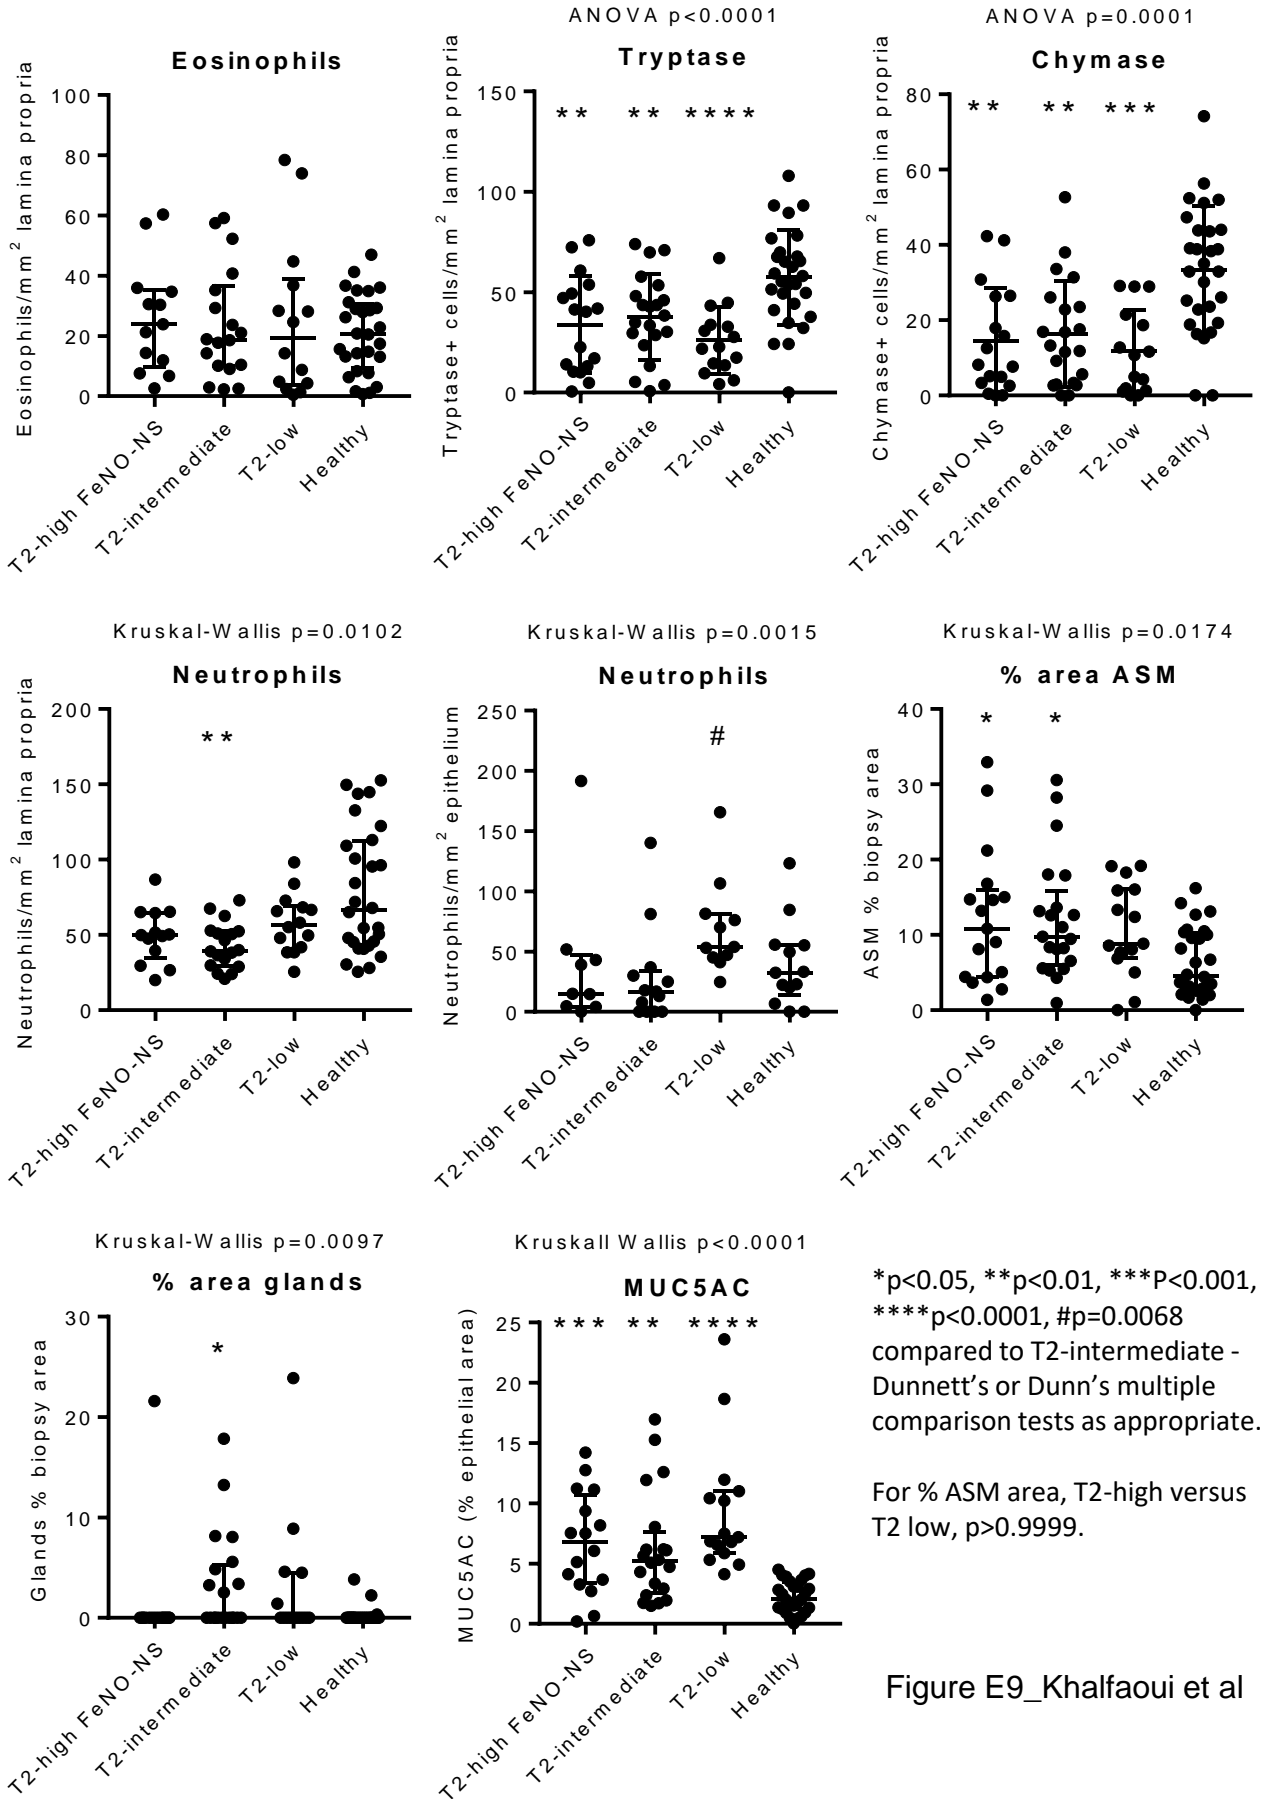

Figure E9\_Khalifaoui et al
