# Supplementary material for: Airway remodelling rather than cellular infiltration characterizes both type2 cytokine biomarker‐high and ‐low severe asthma
Source: PubMed Central journal article supplement (PMC9790286; doi:10.1111/all.15376), 2022-05-25
Supplement: ALL-77-2974-s005.pdf [file ALL-77-2974-s005.pdf]

## Supplementary figure E6

|              | IL-13 | IL-4              | IL-5              | TSLP              | CCL26             | IL-33             | CCL17             | IFN $\gamma$      | FeNO              | Blood eos         | Sputum eos        |
|--------------|-------|-------------------|-------------------|-------------------|-------------------|-------------------|-------------------|-------------------|-------------------|-------------------|-------------------|
| IL-13        |       | <b>&lt;0.0001</b> | <b>&lt;0.0001</b> | <b>&lt;0.0001</b> | <b>&lt;0.0001</b> | <b>0.0003</b>     | <b>&lt;0.0001</b> | <b>0.0005</b>     | <b>0.0023</b>     | <b>0.0172</b>     | 0.0986            |
| IL-4         | 0.655 |                   | <b>&lt;0.0001</b> | <b>&lt;0.0001</b> | <b>&lt;0.0001</b> | <b>0.0010</b>     | <b>&lt;0.0001</b> | <b>&lt;0.0001</b> | <b>&lt;0.0001</b> | <b>0.0193</b>     | <b>0.0001</b>     |
| IL-5         | 0.621 | 0.854             |                   | <b>&lt;0.0001</b> | <b>&lt;0.0001</b> | <b>&lt;0.0001</b> | <b>&lt;0.0001</b> | <b>&lt;0.0001</b> | <b>&lt;0.0001</b> | <b>0.0346</b>     | <b>&lt;0.0001</b> |
| TSLP         | 0.592 | 0.705             | 0.826             |                   | <b>&lt;0.0001</b> | <b>0.0002</b>     | <b>&lt;0.0001</b> | <b>&lt;0.0001</b> | <b>0.0074</b>     | 0.2602            | <b>0.0050</b>     |
| CCL26        | 0.610 | 0.870             | 0.903             | 0.809             |                   | <b>0.0012</b>     | <b>&lt;0.0001</b> | <b>&lt;0.0001</b> | <b>&lt;0.0001</b> | <b>0.0334</b>     | <b>0.0002</b>     |
| IL-33        | 0.604 | 0.900             | 0.763             | 0.633             | 0.806             |                   | <b>0.0020</b>     | <b>0.0009</b>     | 0.2566            | 0.8462            | 0.0794            |
| CCL17        | 0.505 | 0.643             | 0.821             | 0.860             | 0.759             | 0.564             |                   | <b>&lt;0.0001</b> | <b>&lt;0.0001</b> | <b>0.0255</b>     | <b>0.0037</b>     |
| IFN $\gamma$ | 0.522 | 0.484             | 0.609             | 0.540             | 0.478             | 0.458             | 0.487             |                   | <b>0.0457</b>     | 0.4335            | <b>0.0017</b>     |
| FeNO         | 0.458 | 0.669             | 0.611             | 0.407             | 0.626             | 0.585             | 0.310             | 0.179             |                   | <b>&lt;0.0001</b> | <b>0.0026</b>     |
| Blood eos    | 0.361 | 0.356             | 0.323             | 0.176             | 0.325             | 0.340             | 0.123             | -0.030            | 0.583             |                   | <b>0.0452</b>     |
| Sputum eos   | 0.276 | 0.595             | 0.644             | 0.452             | 0.577             | 0.465             | 0.498             | 0.292             | 0.487             | 0.331             |                   |

Figure E6\_Khalifaoui et al
