# Supplementary material for: Airway remodelling rather than cellular infiltration characterizes both type2 cytokine biomarker‐high and ‐low severe asthma
Source: PubMed Central journal article supplement (PMC9790286; doi:10.1111/all.15376), 2022-05-25
Supplement: ALL-77-2974-s008.pdf [file ALL-77-2974-s008.pdf]

# Supplementary figure E7

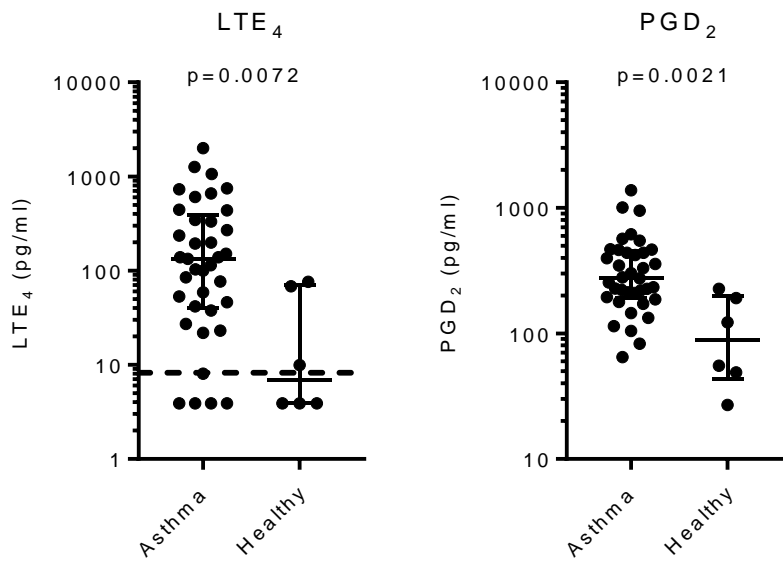

Figure E7\_Khalifaoui et al
